# Supplementary material for: New MiniPromoter Ple345 (NEFL) Drives Strong and Specific Expression in Retinal Ganglion Cells of Mouse and Primate Retina
Source: PubMed Central journal article supplement — Hum Gene Ther. 2019 Mar 8;30(3):257–72. doi: 10.1089/hum.2018.118 (PMC6437624; doi:10.1089/hum.2018.118), 2019-03-08
Supplement: Supp_Fig1.pdf [file Supp_Fig1.pdf]

## SUPPLEMENTAL FIGURES

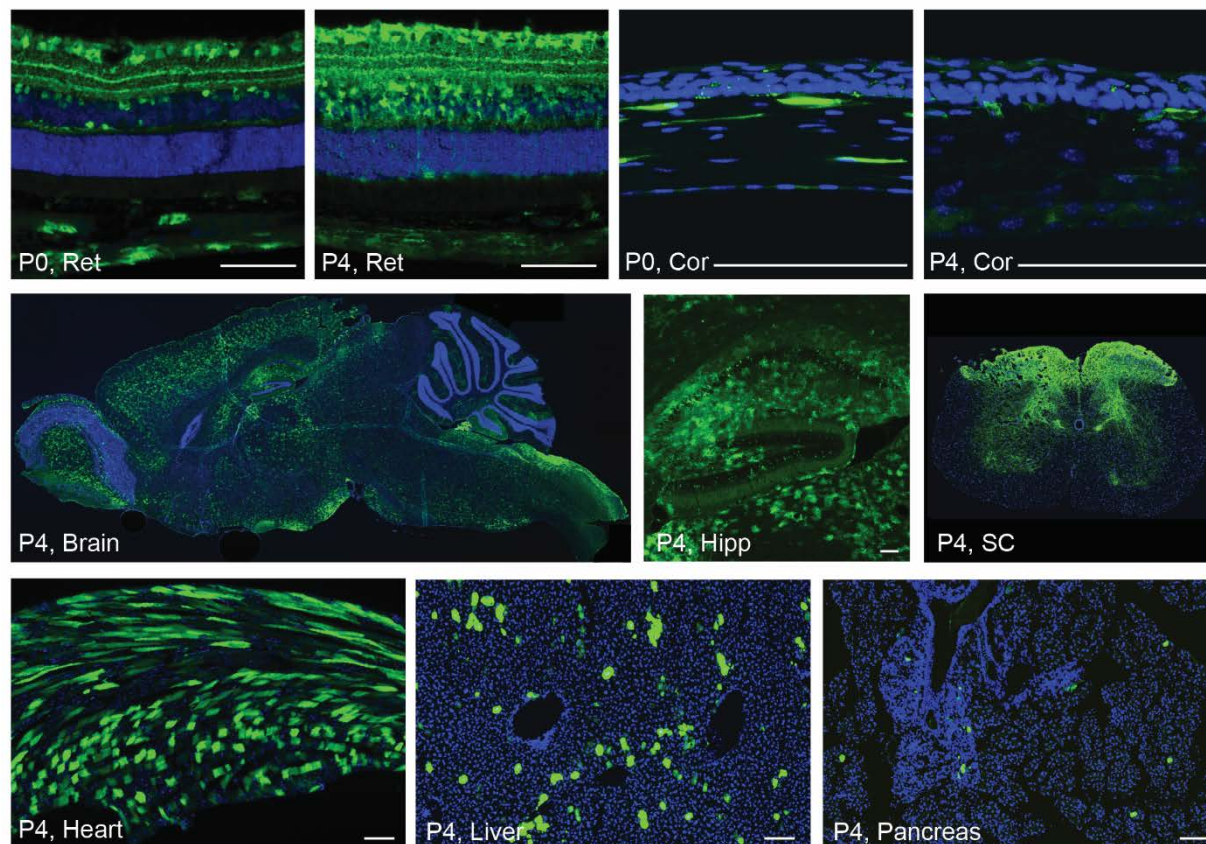

### Figure S1. The smCBA Promoter Delivered by Intravenous Injection in Neonatal Mice Showed Ubiquitous Expression

smCBA driving EmGFP-WPRE in rAAV9, was injected intravenously into neonatal mice, and harvested four weeks later. Brain, whole sagittal brain; Cor, cornea (epithelium up); EmGFP, emerald green fluorescent protein; Hipp, hippocampus; P0, post-natal day 0 (injection day); P4, post-natal day 4 (injection day); rAAV9, recombinant adeno-associated virus packaged in capsid 9; Ret, retina (ganglion cells up); SC, lumbar spinal cord (dorsal up); WPRE, woodchuck hepatitis virus posttranscriptional regulatory element. Blue, DAPI; green, anti-GFP. Scale bars, 100  $\mu$ m.
