# Supplementary material for: New MiniPromoter Ple345 (NEFL) Drives Strong and Specific Expression in Retinal Ganglion Cells of Mouse and Primate Retina
Source: PubMed Central journal article supplement — Hum Gene Ther. 2019 Mar 8;30(3):257–72. doi: 10.1089/hum.2018.118 (PMC6437624; doi:10.1089/hum.2018.118), 2019-03-08
Supplement: Supp_Fig2.pdf [file Supp_Fig2.pdf]

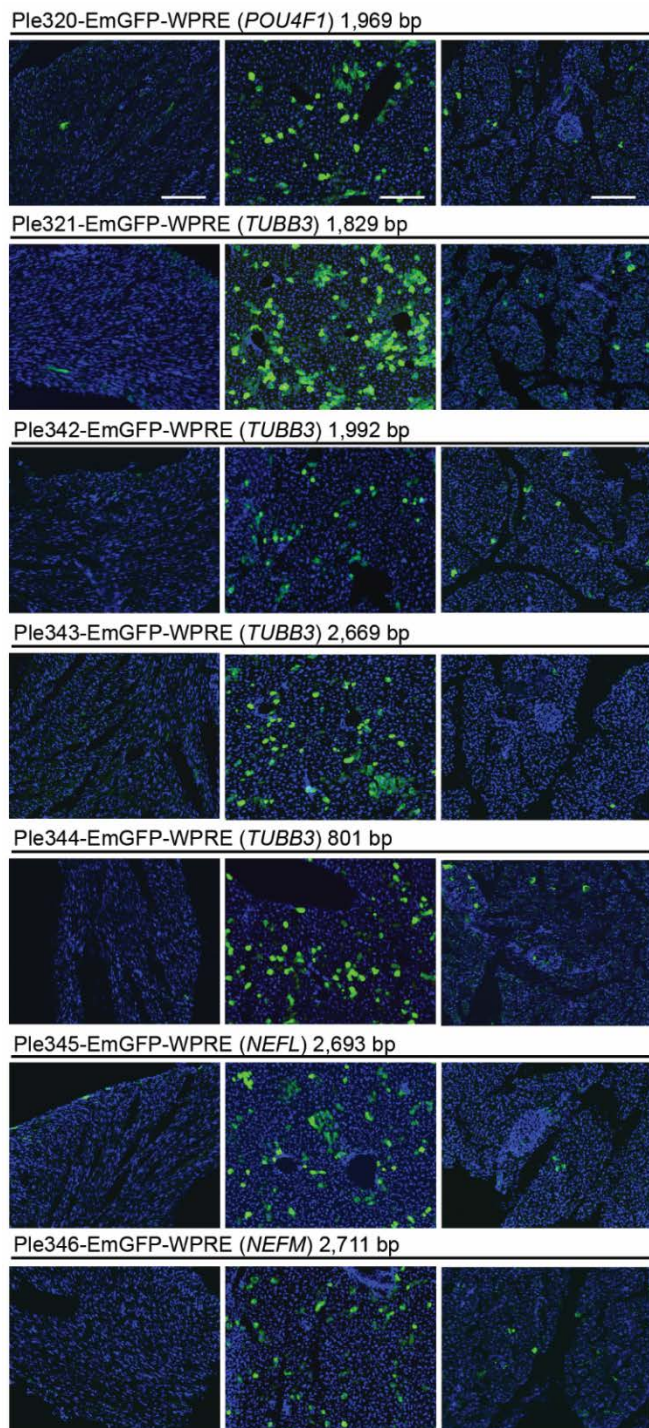

**Figure S2. Seven MiniPromoters Delivered by Intravenous Injection in Neonatal Mice Showed Variable Expression in Peripheral Tissues**

MiniPromoters, each driving EmGFP-WPRE in rAAV9, were injected intravenously into neonatal mice, and harvested four weeks later. Tissues imaged are, from left to right: heart, liver, and pancreas. EmGFP, emerald green fluorescent protein; rAAV9, recombinant adeno-associated virus packaged in capsid 9; WPRE, woodchuck hepatitis virus posttranscriptional regulatory element. Blue, DAPI, green, anti-GFP. Scale bars, 100  $\mu$ m.
