# Supplementary material for: New MiniPromoter Ple345 (NEFL) Drives Strong and Specific Expression in Retinal Ganglion Cells of Mouse and Primate Retina
Source: PubMed Central journal article supplement — Hum Gene Ther. 2019 Mar 8;30(3):257–72. doi: 10.1089/hum.2018.118 (PMC6437624; doi:10.1089/hum.2018.118), 2019-03-08
Supplement: Supp_Fig3.pdf [file Supp_Fig3.pdf]

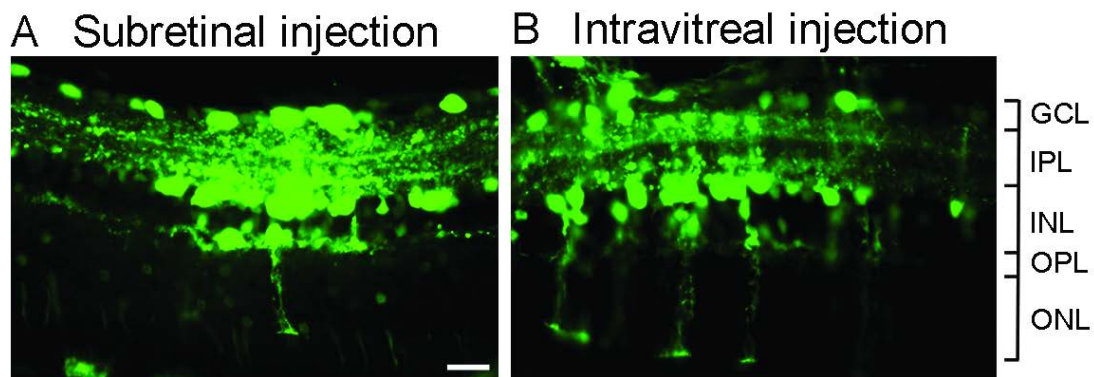

**Figure S3. The smCBA Promoter Delivered by Subretinal and Intravitreal Injection in Adult Mice Showed Ubiquitous Expression**

smCBA driving EmGFP-WPRE in rAAV9, was injected directly into adult mouse eyes, and harvested four weeks later. A) Subretinal and B) intravitreal injection led to expression in the ganglion cell layer (GCL), inner nuclear layer (INL), and outer nuclear layer (ONL). EmGFP, emerald green fluorescent protein; IPL, inner plexiform layer; OPL, outer plexiform layer, rAAV9, recombinant adeno-associated virus packaged in capsid 9; WPRE, woodchuck hepatitis virus posttranscriptional regulatory element. Green, anti-GFP. Scale bar, 20  $\mu$ m.
